# Supplementary material for: Evolutionary constraints over microsatellite abundance in larger mammals as a potential mechanism against carcinogenic burden
Source: PubMed Central journal article supplement (PMC4850439; doi:10.1038/srep25246), 2016-04-29
Supplement: srep25246-s1.pdf [file srep25246-s1.pdf]

# **Evolutionary constraints over microsatellite abundance in larger mammals as a potential mechanism against carcinogenic burden**

Jung Youn Park, Yong-Rock An, Chul-Min An, Jung-Ha Kang, Eun Mi Kim, Heebal Kim, Seoae Cho, Jaemin Kim

---

## **SUPPLEMENTARY INFORMATION**

---

### **1. Supplementary Figures**

**Supplementary Figure 1..... 2**

**Supplementary Figure 2..... 3**

**Supplementary Figure 3..... 4**

### **2. Supplementary Table**

**Supplementary Table 1..... 5**

**Supplementary Table 2..... 6**

**Supplementary Table 3..... 7**

Supplementary Figure S1. Number of microsatellites versus log-transformed genome size of 31 mammalian species.

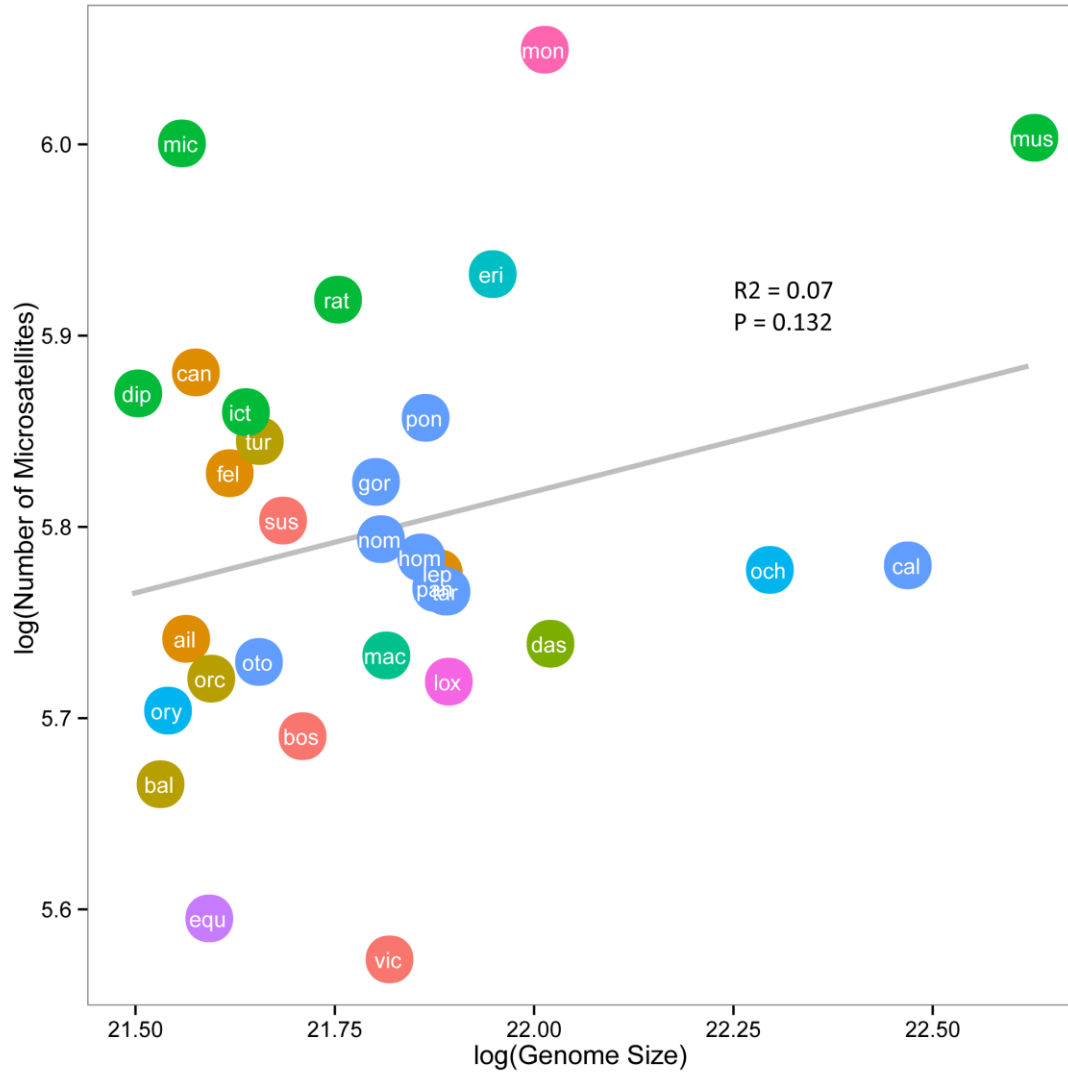

Supplementary Figure S2. Number of microsatellites in genic region versus body mass in 29 mammalian species.

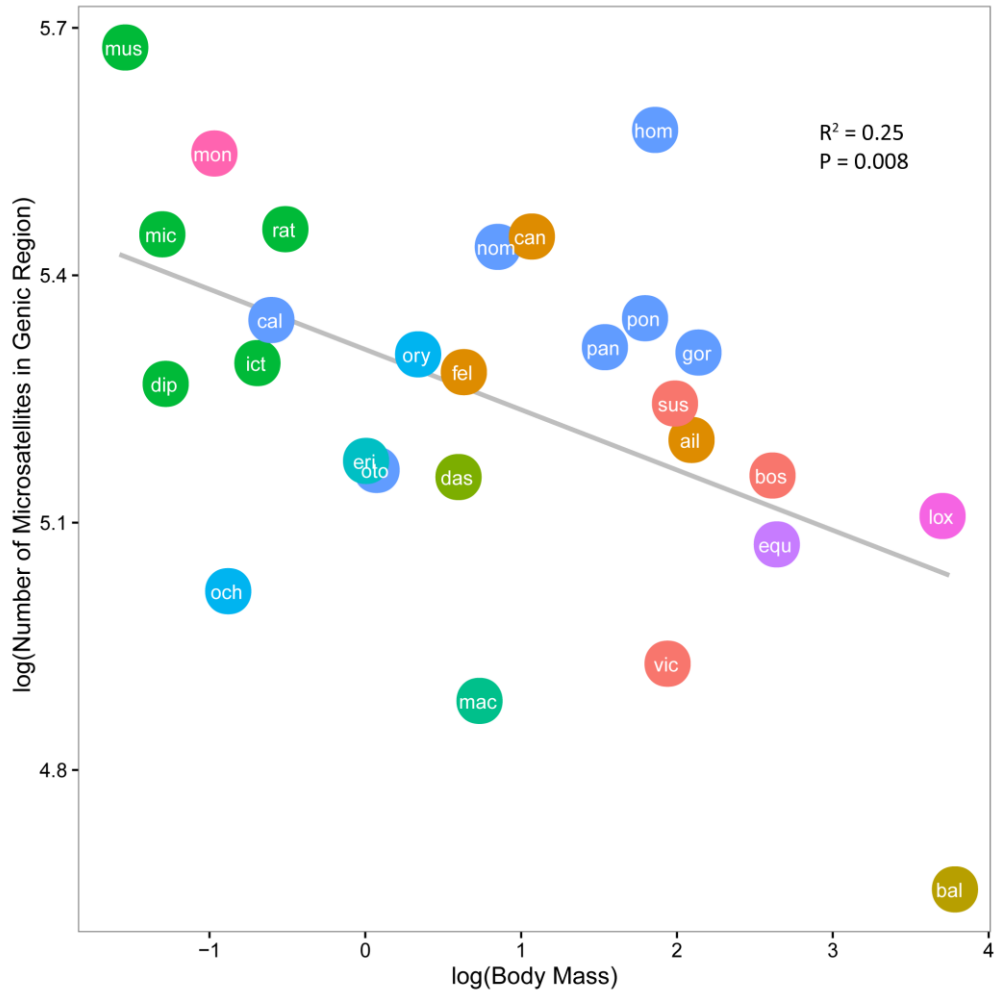

Supplementary Figure S3. Number of microsatellites in oncogene and tumor suppressor gene regions versus body mass in 29 mammalian species.

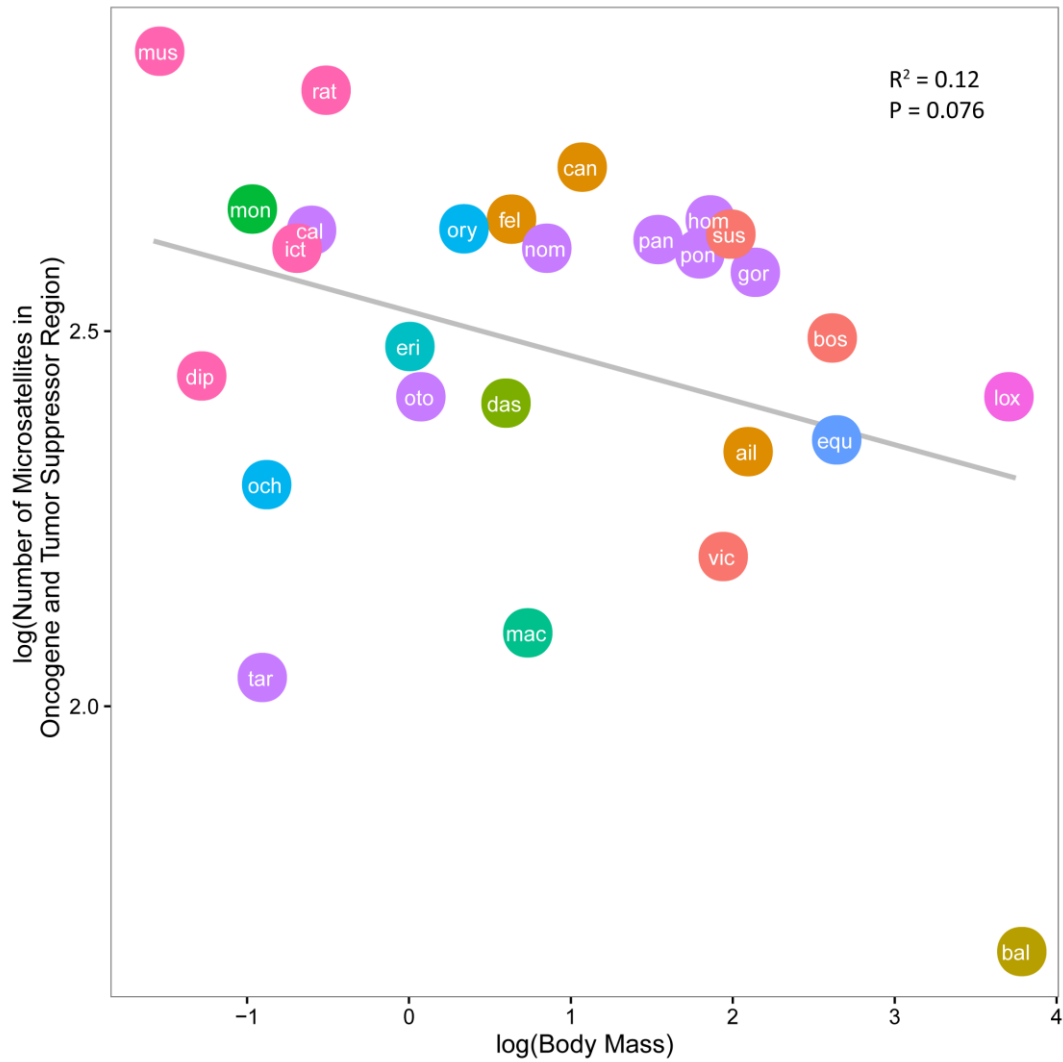

Supplementary Table S1. Summary of mammalian species in this study.

| Species                           | Order           | ABB <sup>1</sup> | Microsatellites <sup>2</sup> | BM <sup>3</sup> | BMR <sup>4</sup> | T <sub>b</sub> <sup>5</sup> | Ref. BMR | Ref. T <sub>b</sub> |
|-----------------------------------|-----------------|------------------|------------------------------|-----------------|------------------|-----------------------------|----------|---------------------|
| <i>Ailuropoda melanoleuca</i>     | Carnivora       | ail              | 5.741                        | 114.000         | 10757.0          | 38.9                        | [1]      | [2]                 |
| <i>Balaenoptera acutorostrata</i> | Cetacea         | bal              | 5.665                        | 5587.094        | 365737.1         | 35.3                        | [3]      | [4]                 |
| <i>Bos taurus</i>                 | Artiodactyla    | bos              | 5.690                        | 377.161         | 33700.4          | 38.4                        | [5]      | [2]                 |
| <i>Callithrix jacchus</i>         | Primates        | cal              | 5.780                        | 0.230           | 152.0            | 36                          | [6]      | [2]                 |
| <i>Canis familiaris</i>           | Carnivora       | can              | 5.880                        | 10.770          | 7467.2           | 38.4                        | [5]      | [2]                 |
| <i>Dasypus novemcinctus</i>       | Cingulata       | das              | 5.739                        | 3.643           | 865.0            | 34.5                        | [6]      | [5]                 |
| <i>Dipodomys ordii</i>            | Rodentia        | dip              | 5.869                        | 0.048           | 62.5             | 34.6                        | [5]      | [2]                 |
| <i>Equus caballus</i>             | Perissodactyla  | equ              | 5.595                        | 401.799         | 62473.0          | 38.3                        | [5]      | [2]                 |
| <i>Erinaceus europaeus</i>        | Erinaceomorpha  | eri              | 5.932                        | 0.930           | 471.7            | 35.6                        | [5]      | [2]                 |
| <i>Felis catus</i>                | Carnivora       | fel              | 5.828                        | 3.942           | 1845.6           | 38.1                        | [5]      | [2]                 |
| <i>Gorilla gorilla</i>            | Primates        | gor              | 5.823                        | 126.294         | 27453.3          | 35.5                        | [7]      | [2]                 |
| <i>Homo sapiens</i>               | Primates        | hom              | 5.784                        | 66.548          | 14107.6          | 37                          | [6]      | [2]                 |
| <i>Ictidomys tridecemlineatus</i> | Rodentia        | ict              | 5.860                        | 0.187           | 103.7            | 35.7                        | [5]      | [5]                 |
| <i>Leptonychotes weddellii</i>    | Carnivora       | lep              | 5.775                        | 395.800         | 88908.3          | 37.3                        | [5]      | [2]                 |
| <i>Loxodonta africana</i>         | Proboscidea     | lox              | 5.719                        | 4652.270        | 246771.7         | 36.2                        | [5]      | [2]                 |
| <i>Macropus eugenii</i>           | Diprotodontia   | mac              | 5.732                        | 4.967           | 1375.7           | 36.5                        | [5]      | [2]                 |
| <i>Microtus ochrogaster</i>       | Rodentia        | mic              | 6.000                        | 0.046           | 128.6            | 37.9                        | [8]      | [2]                 |
| <i>Monodelphis domestica</i>      | Didelphimorphia | mon              | 6.049                        | 0.099           | 60.0             | 32.6                        | [6]      | [2]                 |
| <i>Mus musculus</i>               | Rodentia        | mus              | 6.003                        | 0.026           | 57.3             | 36.7                        | [5]      | [2]                 |
| <i>Nomascus leucogenys</i>        | Primates        | nom              | 5.793                        | 6.510           | 181.0            | 39                          | [5]      | [2]                 |
| <i>Ochotona princeps</i>          | Lagomorpha      | och              | 5.777                        | 0.121           | 166.8            | 40.1                        | [8]      | [2]                 |

|                       |              |     |       |          |          |      |      |     |
|-----------------------|--------------|-----|-------|----------|----------|------|------|-----|
| Orcinus orca          | Cetacea      | orc | 5.720 | 6314.379 | 407850.6 | 36   | [9]  | [2] |
| Oryctolagus cuniculus | Lagomorpha   | ory | 5.704 | 2.006    | 1140.0   | 39   | [6]  | [2] |
| Otolemur garnettii    | Primates     | oto | 5.729 | 1.086    | 558.2    | 36   | [5]  | [2] |
| Pan troglodytes       | Primates     | pan | 5.768 | 31.673   | 1407.6   | 35.7 | [6]  | [2] |
| Pongo abelii          | Primates     | pon | 5.857 | 57.348   | 1514.3   | 37.1 | [5]  | [2] |
| Rattus norvegicus     | Rodentia     | rat | 5.918 | 0.282    | 307.5    | 37.2 | [5]  | [2] |
| Sus scrofa            | Artiodactyla | sus | 5.803 | 89.243   | 17581.9  | 38.8 | [6]  | [2] |
| Tarsius syrichta      | Primates     | tar | 5.766 | 0.114    | 76.7     | 33.8 | [5]  | [2] |
| Tursiops truncatus    | Cetacea      | tur | 5.845 | 223.333  | 55441.1  | 36.3 | [5]  | [2] |
| Vicugna pacos         | Artiodactyla | vic | 5.574 | 80.000   | 27867.7  | 39.3 | [10] | [2] |

<sup>1</sup>abbreviations

<sup>2</sup>number of microsatellites (log-transformed)

<sup>3</sup>body mass in kilograms. Body mass estimates were averaged across different studies. [2, 5, 11-13]

<sup>4</sup>basal metabolic rate (mL O<sub>2</sub> / h). We used 20.08 Jml<sup>-1</sup> O<sub>2</sub> to convert oxygen consumption to heat production [14].

<sup>5</sup>body temperature (in Celsius)

Supplementary Table S2. Relationships between number of microsatellites in the whole genome and life history traits in non-phylogenetic models under different assumption on activation energy.

| <b>Dependent variable</b>                                        | <b><i>Simple linear regression</i></b> |              |                       |                | <b><i>Multiple linear regression</i></b> |                |
|------------------------------------------------------------------|----------------------------------------|--------------|-----------------------|----------------|------------------------------------------|----------------|
|                                                                  | <i>df</i> <sup>1</sup>                 | slope (beta) | <i>R</i> <sup>2</sup> | <i>P-value</i> | slope (beta)                             | <i>P-value</i> |
| body mass                                                        | 29                                     | -0.042       | 0.38                  | < 0.001        | -0.043                                   | 0.019          |
| temperature-corrected mass-specific basal metabolic rate (E=0.4) | 29                                     | 0.046        | 0.24                  | < 0.01         | -0.0017                                  | 0.94           |
| body mass                                                        | -                                      | -            | -                     | -              | -0.041                                   | 0.025          |
| temperature-corrected mass-specific basal metabolic rate (E=0.8) | 29                                     | 0.047        | 0.26                  | < 0.01         | 0.0022                                   | 0.97           |
| body mass                                                        | -                                      | -            | -                     | -              | -0.046                                   | 0.013          |
| mass-specific basal metabolic rate                               | 29                                     | 0.045        | 0.23                  | < 0.01         | -0.0056                                  | 0.81           |

<sup>1</sup>df denotes degree of freedom

Supplementary Table S3. Relationships between number of microsatellites within genic region and life history traits in non-phylogenetic models under different assumption on activation energy.

| <b>Dependent variable</b>                                         | <b><i>Simple linear regression</i></b> |              |                       |                | <b><i>Multiple linear regression</i></b> |                |
|-------------------------------------------------------------------|----------------------------------------|--------------|-----------------------|----------------|------------------------------------------|----------------|
|                                                                   | <i>df</i> <sup>1</sup>                 | slope (beta) | <i>R</i> <sup>2</sup> | <i>P-value</i> | slope (beta)                             | <i>P-value</i> |
| body mass                                                         | 25                                     | -0.073       | 0.25                  | < 0.01         | -0.10                                    | 0.030          |
| temperature-corrected mass-specific basal metabolic rate (E=0.4)  | 25                                     | 0.060        | 0.10                  | 0.1            | -0.043                                   | 0.44           |
| body mass                                                         | -                                      | -            | -                     | -              | -0.10                                    | 0.030          |
| temperature-corrected mass-specific basal metabolic rate (E=0.65) | 25                                     | 0.059        | 0.11                  | 0.099          | -0.044                                   | 0.44           |
| body mass                                                         | -                                      | -            | -                     | -              | -0.10                                    | 0.030          |
| temperature-corrected mass-specific basal metabolic rate (E=0.8)  | 25                                     | 0.059        | 0.11                  | 0.098          | 0.043                                    | 0.44           |
| body mass                                                         | -                                      | -            | -                     | -              | -0.10                                    | 0.028          |
| mass-specific basal metabolic rate                                | 25                                     | 0.060        | 0.10                  | 0.10           | -0.043                                   | 0.44           |

<sup>1</sup>df denotes degree of freedom



## Reference

1. Nie Y, Speakman JR, Wu Q, Zhang C, Hu Y, Xia M, Yan L, Hambly C, Wang L, Wei W: **Exceptionally low daily energy expenditure in the bamboo-eating giant panda.** *Science* 2015, **349**(6244):171-174.
2. Amos W, Filipe LN: **Microsatellite frequencies vary with body mass and body temperature in mammals, suggesting correlated variation in mutation rate.** *PeerJ* 2014, **2**:e663.
3. Hind A, Gurney W: **The metabolic cost of swimming in marine homeotherms.** *Journal of Experimental Biology* 1997, **200**(3):531-542.
4. Olsen E, Sunde J: **Age determination of minke whales (*Balaenoptera acutorostrata*) using the aspartic acid racemization technique.** *Sarsia: North Atlantic Marine Science* 2002, **87**(1):1-8.
5. Sieg AE, O'Connor MP, McNair JN, Grant BW, Agosta SJ, Dunham AE: **Mammalian metabolic allometry: do intraspecific variation, phylogeny, and regression models matter?** *The American Naturalist* 2009, **174**(5):720-733.
6. Tourmente M, Roldan ER: **Mass-Specific Metabolic Rate Influences Sperm Performance through Energy Production in Mammals.** *PloS one* 2015, **10**(9):e0138185.
7. Pontzer H, Raichlen DA, Gordon AD, Schroepfer-Walker KK, Hare B, O'Neill MC, Muldoon KM, Dunsworth HM, Wood BM, Isler K: **Primate energy expenditure and life history.** *Proceedings of the National Academy of Sciences* 2014, **111**(4):1433-1437.
8. Lovegrove BG: **The zoogeography of mammalian basal metabolic rate.** *The American Naturalist* 2000, **156**(2):201-219.
9. Worthy GA, Worthy TA, Yochem PK, Dold C: **Basal metabolism of an adult male killer whale (*Orcinus orca*).** *Marine Mammal Science* 2014, **30**(3):1229-1237.
10. Riek A: **Relationship between field metabolic rate and body weight in mammals: effect of the study.** *Journal of Zoology* 2008, **276**(2):187-194.
11. Jones KE, Bielby J, Cardillo M, Fritz SA, O'Dell J, Orme CDL, Safi K, Sechrest W, Boakes EH, Carbone C: **PanTHERIA: a species-level database of life history, ecology, and geography of extant and recently extinct mammals: Ecological Archives E090-184.** *Ecology* 2009, **90**(9):2648-2648.
12. Tacutu R, Craig T, Budovsky A, Wuttke D, Lehmann G, Taranukha D, Costa J, Fraifeld VE, De Magalhães JoP: **Human ageing genomic resources: integrated databases and tools for the biology and genetics of ageing.** *Nucleic acids research* 2012:gks1155.
13. White CR, Seymour RS: **The role of gravity in the evolution of mammalian blood pressure.** *Evolution* 2014, **68**(3):901-908.
14. Schmidt-Nielsen K: **Animal physiology: adaptation and environment:** Cambridge University Press; 1997.
